# Supplementary material for: Pea-Tea Intercropping Improves Tea Quality through Regulating Amino Acid Metabolism and Flavonoid Biosynthesis
Source: MDPI journal article supplement (doi:10.3390/foods11223746), 2022-11-21
Supplement: s1 [file s1]

Table S1 Primers for quantitative real-time PCR analysis.

| Gene ID    | Sense primer (F)            | Anti-sense primer (R)        | Product length (bp) |
|------------|-----------------------------|------------------------------|---------------------|
| CSS0028188 | ATCTCTATCCTCACCA<br>ACTCTTG | TCTTATTCTCCATCGTCTT<br>CTCC  | 124                 |
| CSS0010162 | TCTTGGAACCTCACTA<br>CTCATAC | ATCTCTAATGTCTGCTTCA<br>ACTTG | 180                 |
| CSS0024005 | GCTCGGCGATGATTCC<br>TAAG    | AACCAAGTAGATTCCAGT<br>CCTC   | 139                 |
| CSS0032332 | GCTGGAAGTGGATAT<br>GACAATG  | TTTCTGGTCTCCGAGGTA<br>GG     | 120                 |
| CSS0036536 | TCTCACCCCTTCCCTAA<br>CAATGG | TCCTTGCCGATGAACGAG<br>TC     | 170                 |
| CSS0048869 | AAACAAGTGAAACCC<br>TGATGG   | CTGAGTGAGAGTGAGAGT<br>CC     | 160                 |
| CSS0029656 | TCTCAAGCCCATTCTT<br>ACAC    | GATTGTCAGCAGATAGAG<br>TCG    | 162                 |
| CSS0005382 | GTTCCATTACAGACAG<br>CCTCAG  | GCTCAACCACCATCTTCA<br>CC     | 151                 |
| CsGAPDH    | TGGGTGTCAATGAGA<br>AGGATTAC | TTTGTGTGGCTGTGATGG<br>AG     | 114                 |
